# Supplementary material for: A combined microscopy and single-cell sequencing approach reveals the ecology, morphology, and phylogeny of uncultured lineages of zoosporic fungi
Source: PubMed Central journal article supplement (PMC10470594; doi:10.1128/mbio.01313-23), 2023-07-24
Supplement: mbio.01313-23-s0002.pdf [file mbio.01313-23-s0002.pdf]

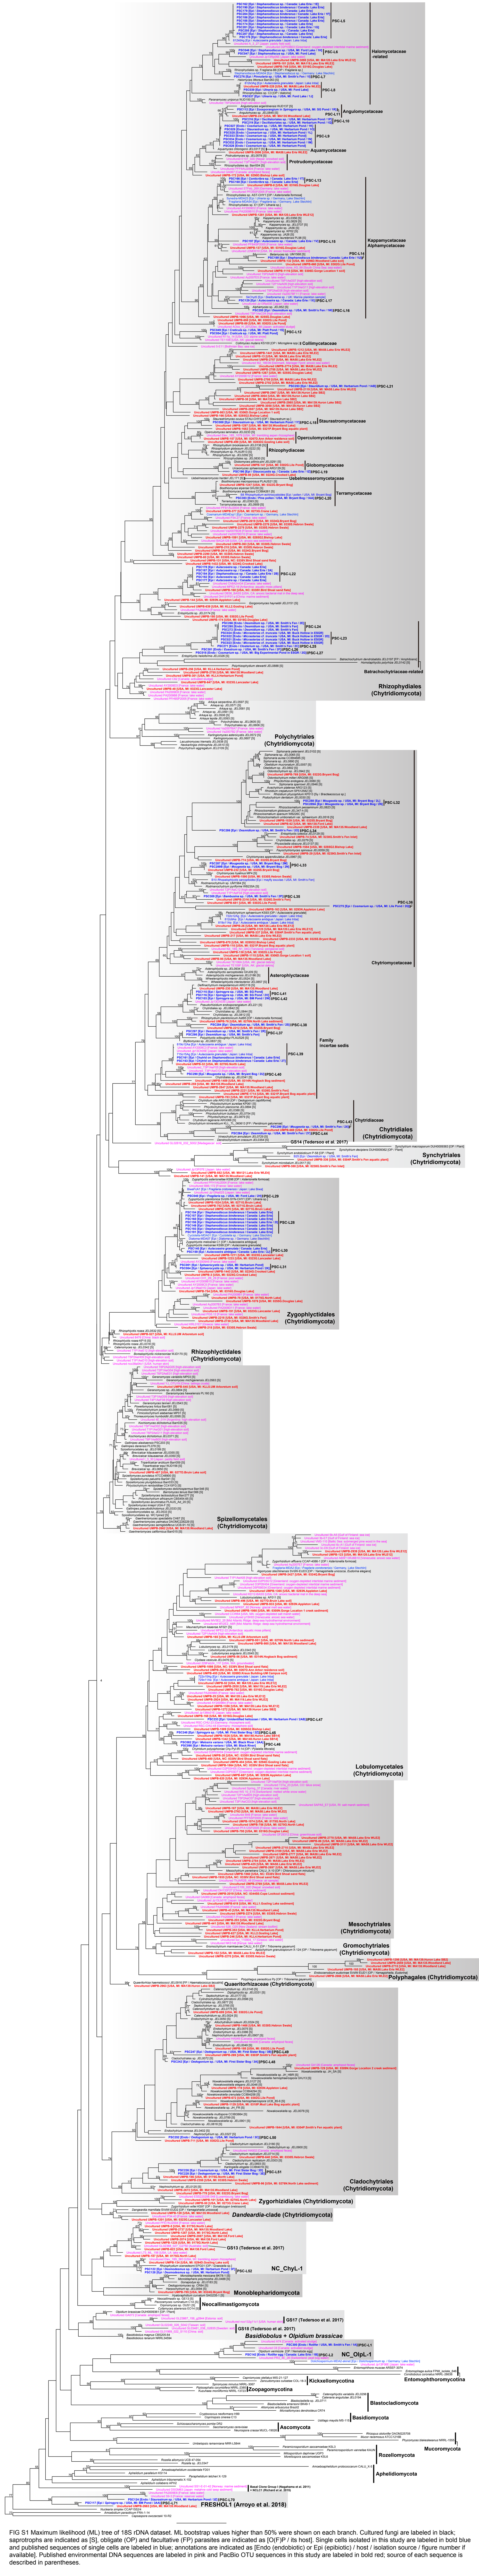

FIG S1 Maximum likelihood (ML) tree of 18S rDNA dataset. ML bootstrap values higher than 50% were shown on each branch. Cultured fungi are labeled in black; saprotrophs are indicated as [S], obligate (OP) and facultative (FP) parasites are indicated as [O]/[F]/[its] hosts. Single cells isolated in this study are labeled in bold blue and published sequences are in blue; annotations are indicated as [Endo] (endobiotic) or [Epi] (epibiotic) / host / isolation source / figure number if available. Published environmental DNA sequences are labeled in pink and Pacbio OTU sequences in this study are labeled in bold red, source of each sequence is described in parentheses.
